# Supplementary material for: Computational study of the adsorption and dissociation of phenol on Pt and Rh surfaces
Source: Royal Society of Chemistry journal article supplement (doi:10.1039/c2cp24064e), 2012-01-01
Supplement: c2cp24064e.pdf [file c2cp24064e.pdf]

# Computational study of the adsorption and dissociation of phenol on Pt and Rh surfaces - *Supporting Information*

Maija L. Honkela,<sup>\*ab</sup> Jonas Björk,<sup>bc</sup> and Mats Persson<sup>bd</sup>

## S.1 Phenol on Pt(111) and Rh(111)

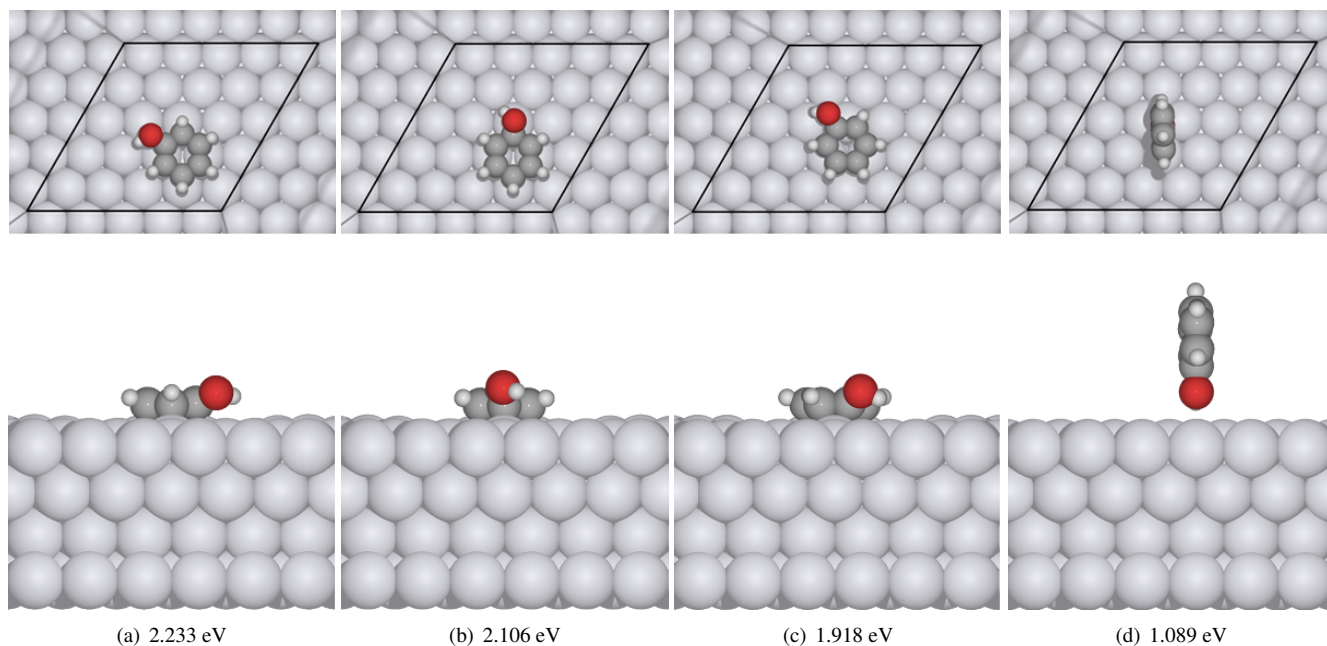

**Figure S1** Top and side views of the most stable adsorption configurations with phenol adsorbed parallel (a-c) and vertically (d) on the Pt(111) surface, with corresponding binding energies indicated for each structure. The black lines in the top views indicate the surface unit cells used in the calculations.

<sup>a</sup> Department of Biotechnology and Chemical Technology, Aalto University, P.O.Box 16100, FI-00076 Aalto, Finland. E-mail: maija.honkela@gmail.com

<sup>b</sup> The Surface Science Research Centre, The University of Liverpool, Liverpool L69 3BX, UK.

<sup>c</sup> Department of Physics, Chemistry and Biology, IFM, Linköping University, 581 83 Linköping, Sweden.

<sup>d</sup> Department of Applied Physics, Chalmers University of Technology, SE 412 96 Göteborg, Sweden.

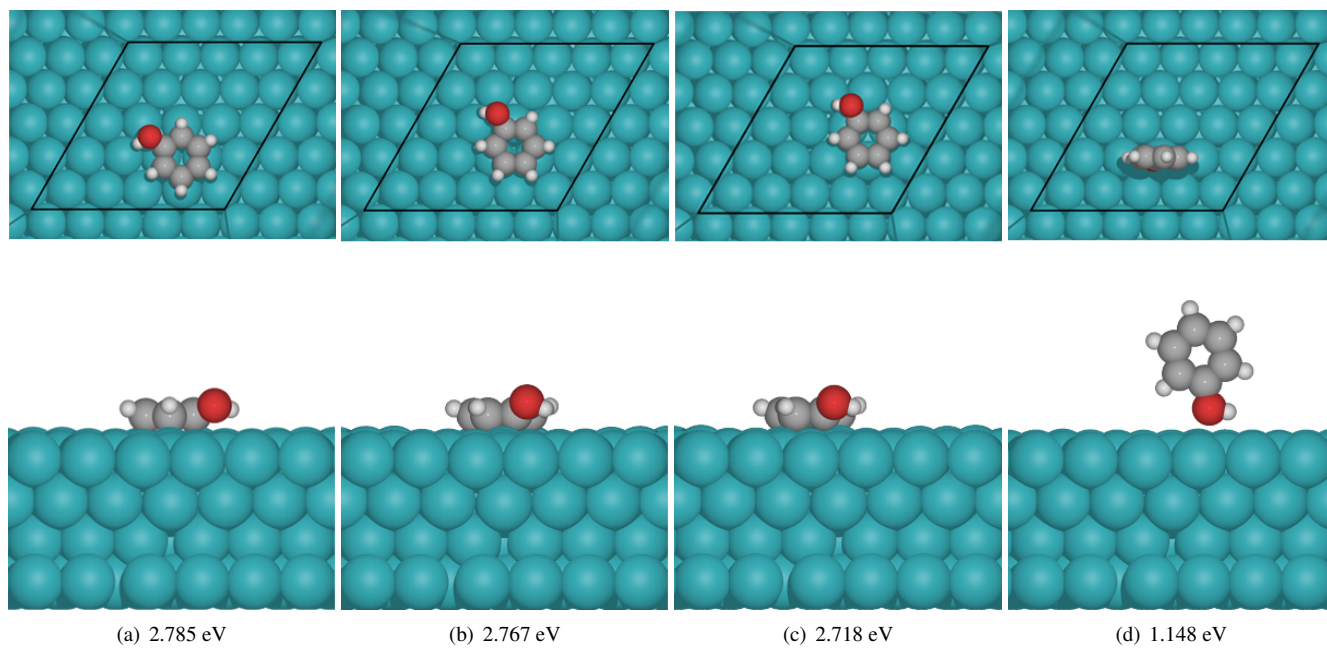

**Figure S2** Top and side views of the most stable adsorption configurations with phenol adsorbed parallel (a-c) and vertically (d) on the Rh(111) surface, with corresponding binding energies indicated for each structure. The black lines in the top views indicate the surface unit cells used in the calculations.

## S.2 Phenol on Pt(211) and Rh(211)

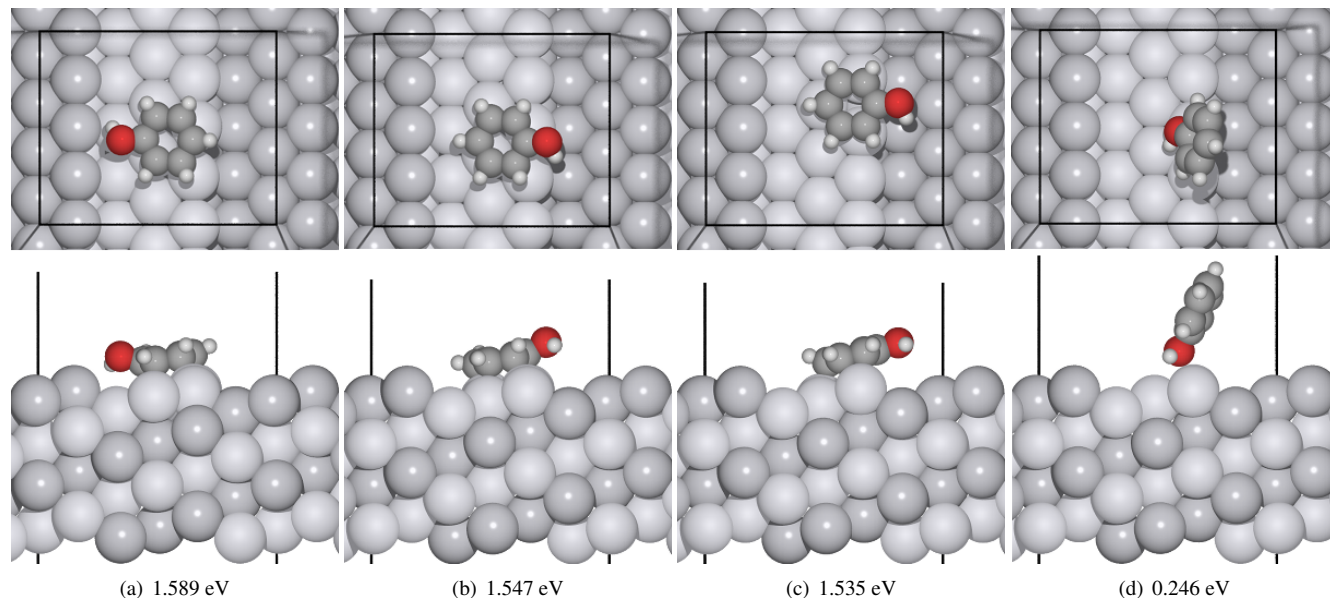

**Figure S3** Top and side views of the most stable adsorption configurations with phenol adsorbed parallel on a terrace (a-c) and vertically (d) on the stepped Pt(211) surface, with corresponding binding energies indicated for each structure. The black lines indicate the surface unit cells used in the calculations.

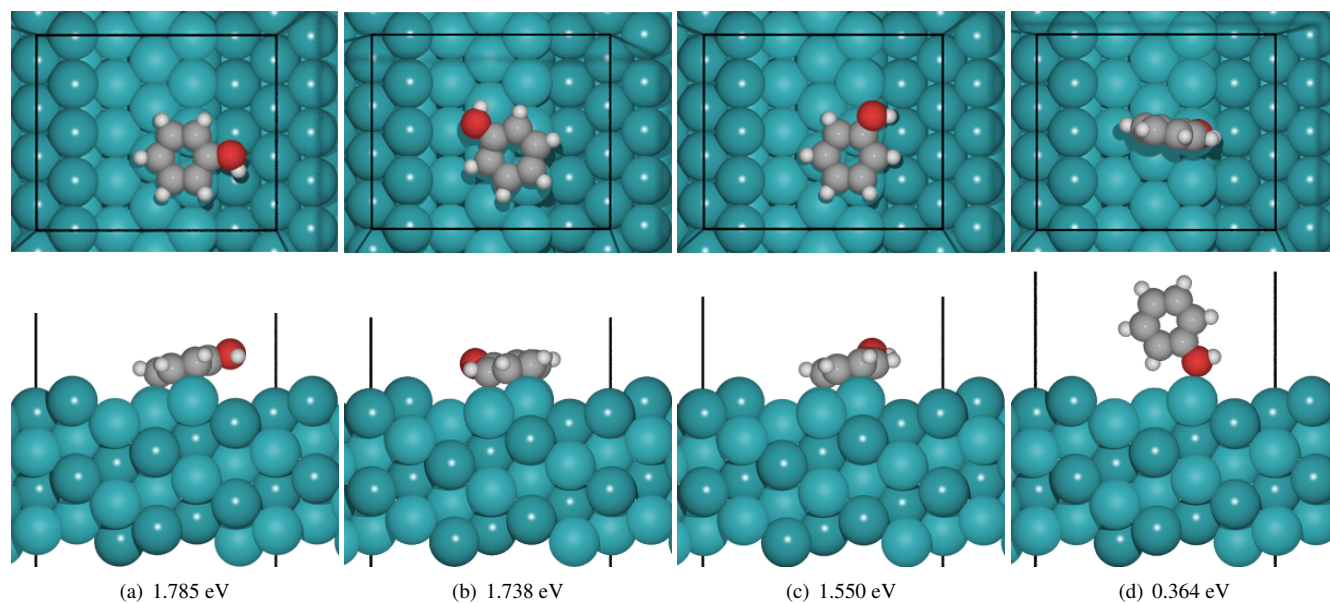

**Figure S4** Top and side views of the most stable adsorption configurations with phenol adsorbed parallel on a terrace (a-c) and vertically (d) on the stepped Rh(211) surface, with corresponding binding energies indicated for each structure. The black lines indicate the surface unit cells used in the calculations.



### S.3 Phenoxy on Pt(111) and Rh(111)

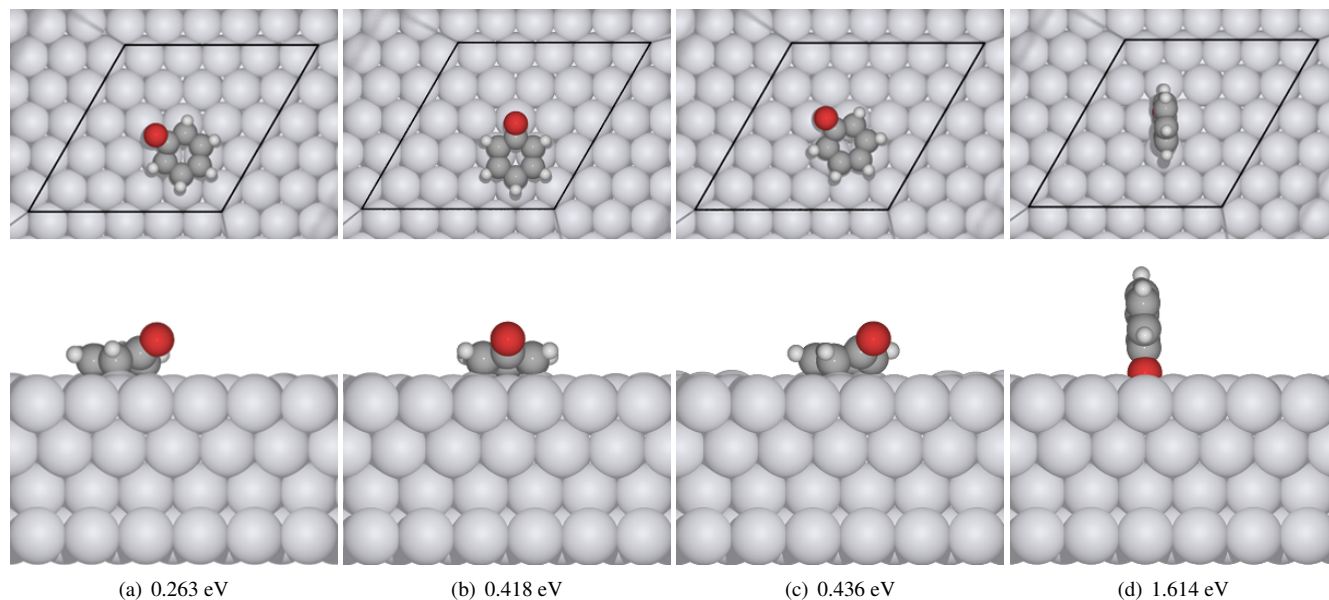

**Figure S5** Top and side views of the most stable adsorption configurations with phenoxy adsorbed parallel on a terrace (a-c) and vertically (d) on the Pt(111) surface, with corresponding reaction energy (with respect to the most stable adsorption site of phenol) indicated for each structure. The black lines in the top views indicate the surface unit cells used in the calculations.

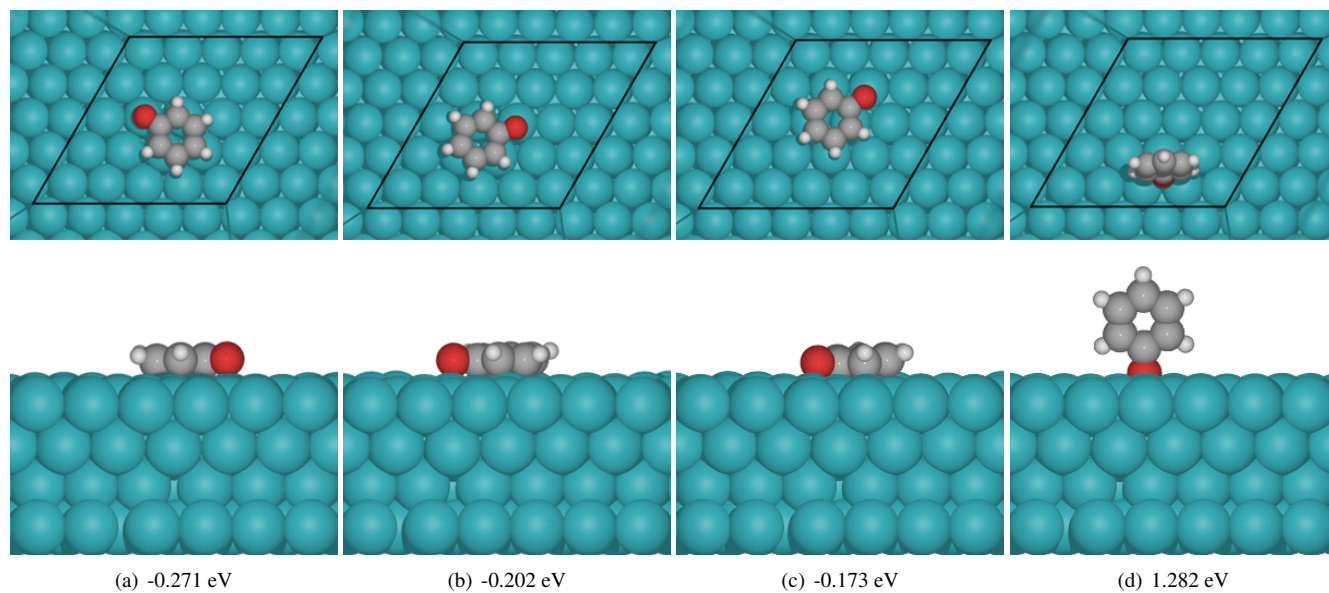

**Figure S6** Top and side views of the most stable adsorption configurations with phenoxy adsorbed parallel on a terrace (a-c) and vertically (d) on the Rh(111) surface, with corresponding reaction energy (with respect to the most stable adsorption site of phenol) indicated for each structure. The black lines in the top views indicate the surface unit cells used in the calculations.

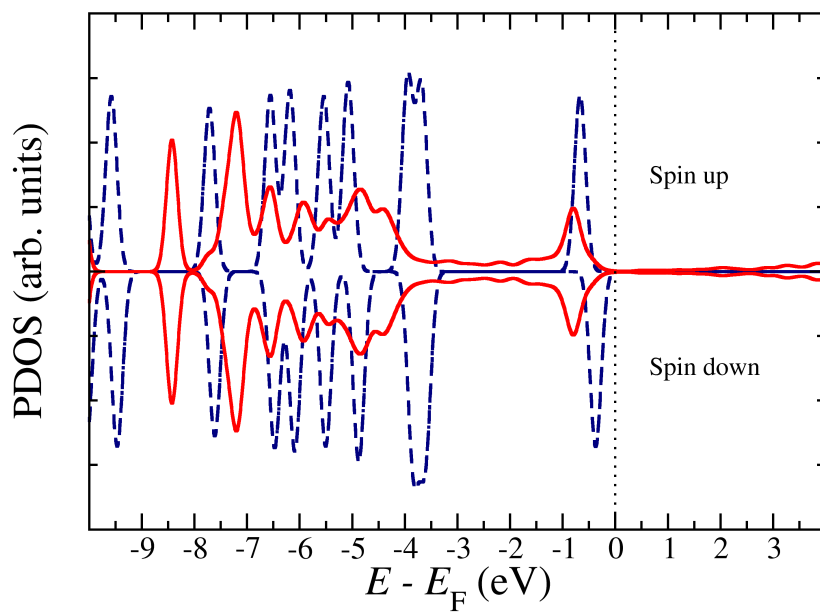

(a) Phenoxy on Pt(111)

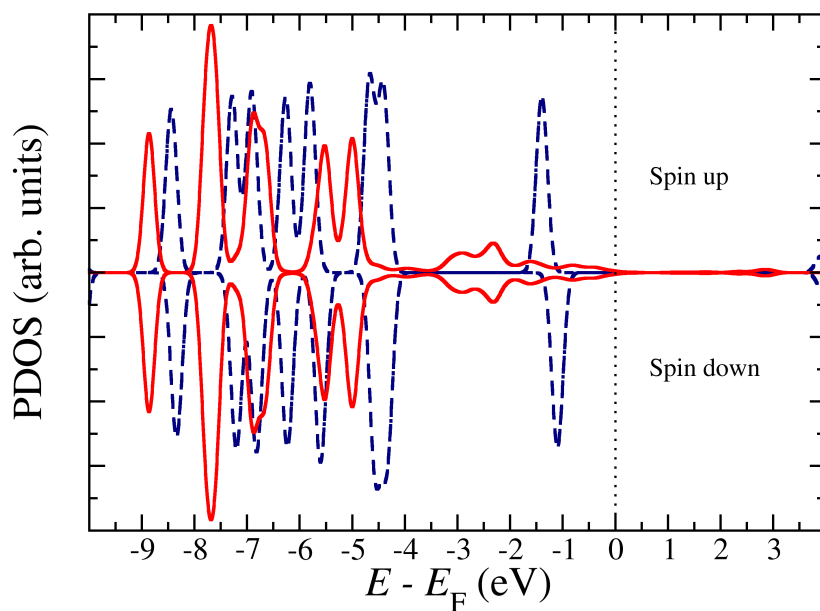

(b) Phenoxy on Rh(111)

**Figure S7** Spin-polarized PDOS of phenoxy (summed over the entire molecule) adsorbed in its most stable adsorption configurations on (a) Pt(111) and (b) Rh(111), respectively, illustrating that phenoxy is not a radical when adsorbed on the two surfaces. The blue dashed lines show the PDOS for phenol in vacuum, while the red solid lines show the PDOS for phenol adsorbed on the two surfaces. The vacuum level of the molecule in vacuum and the molecule on a surface have been aligned in the two plots. The adsorption geometries are depicted in Fig. S5a and S6a for Pt and Rh, respectively.
